# Supplementary material
Source: PubMed Central journal article supplement (PMC3724425)
Supplement: NIHMS463326-supplement-02.pdf [file NIHMS463326-supplement-02.pdf]

|                               | WT            | XBP1 <sup>ΔAd</sup> | <i>t-test</i> |
|-------------------------------|---------------|---------------------|---------------|
| Serum triglyceride [mg/ml TG] | 1.70 ± 0.09   | 1.69 ± 0.09         | 0.966         |
| Serum FFA [mmol/L]            | 0.330 ± 0.073 | 0.295 ± 0.003       | 0.736         |
| Serum Insulin [ng/ml]         | 0.491 ± 0.13  | 0.471 ± 0.018       | 0.350         |
| Blood glucose [mg/dL]         | 160 ± 3.4     | 150 ± 5.5           | 0.144         |
| Body weight [g]               | 20.8 ± 0.48   | 20.7 ± 0.61         | 0.834         |
| GWAT weight [g]               | 0.508 ± 0.13  | 0.507 ± 0.10        | 0.989         |
| #4 Mammary weight [g]         | 0.345 ± 0.06  | 0.322 ± 0.04        | 0.769         |

**Table S1. Basal metabolic parameters in WT and XBP1<sup>ΔAd</sup> female mice**

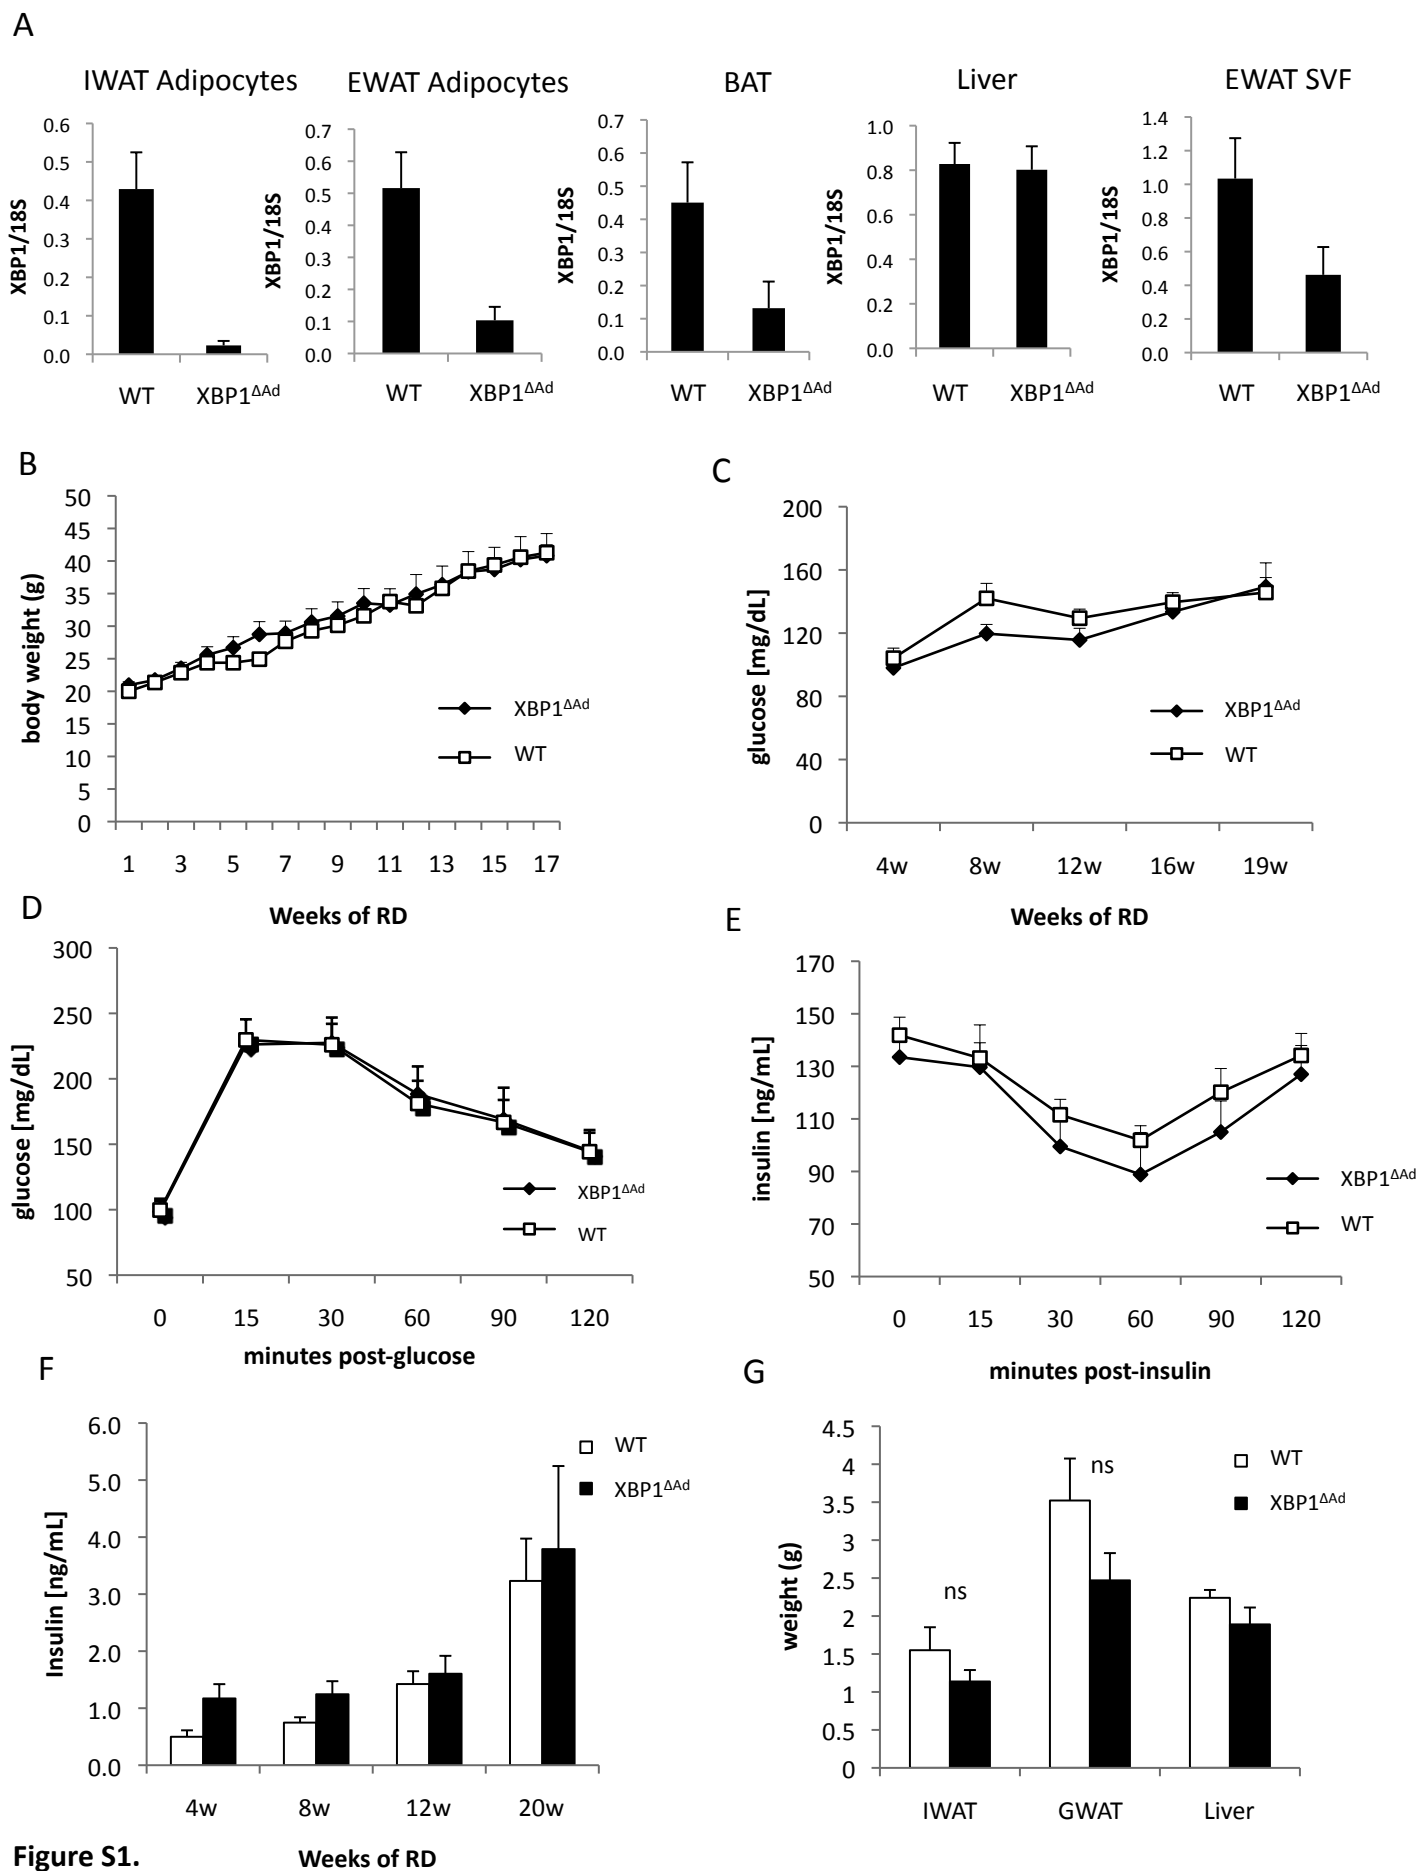

Figure S1.

Weeks of RD

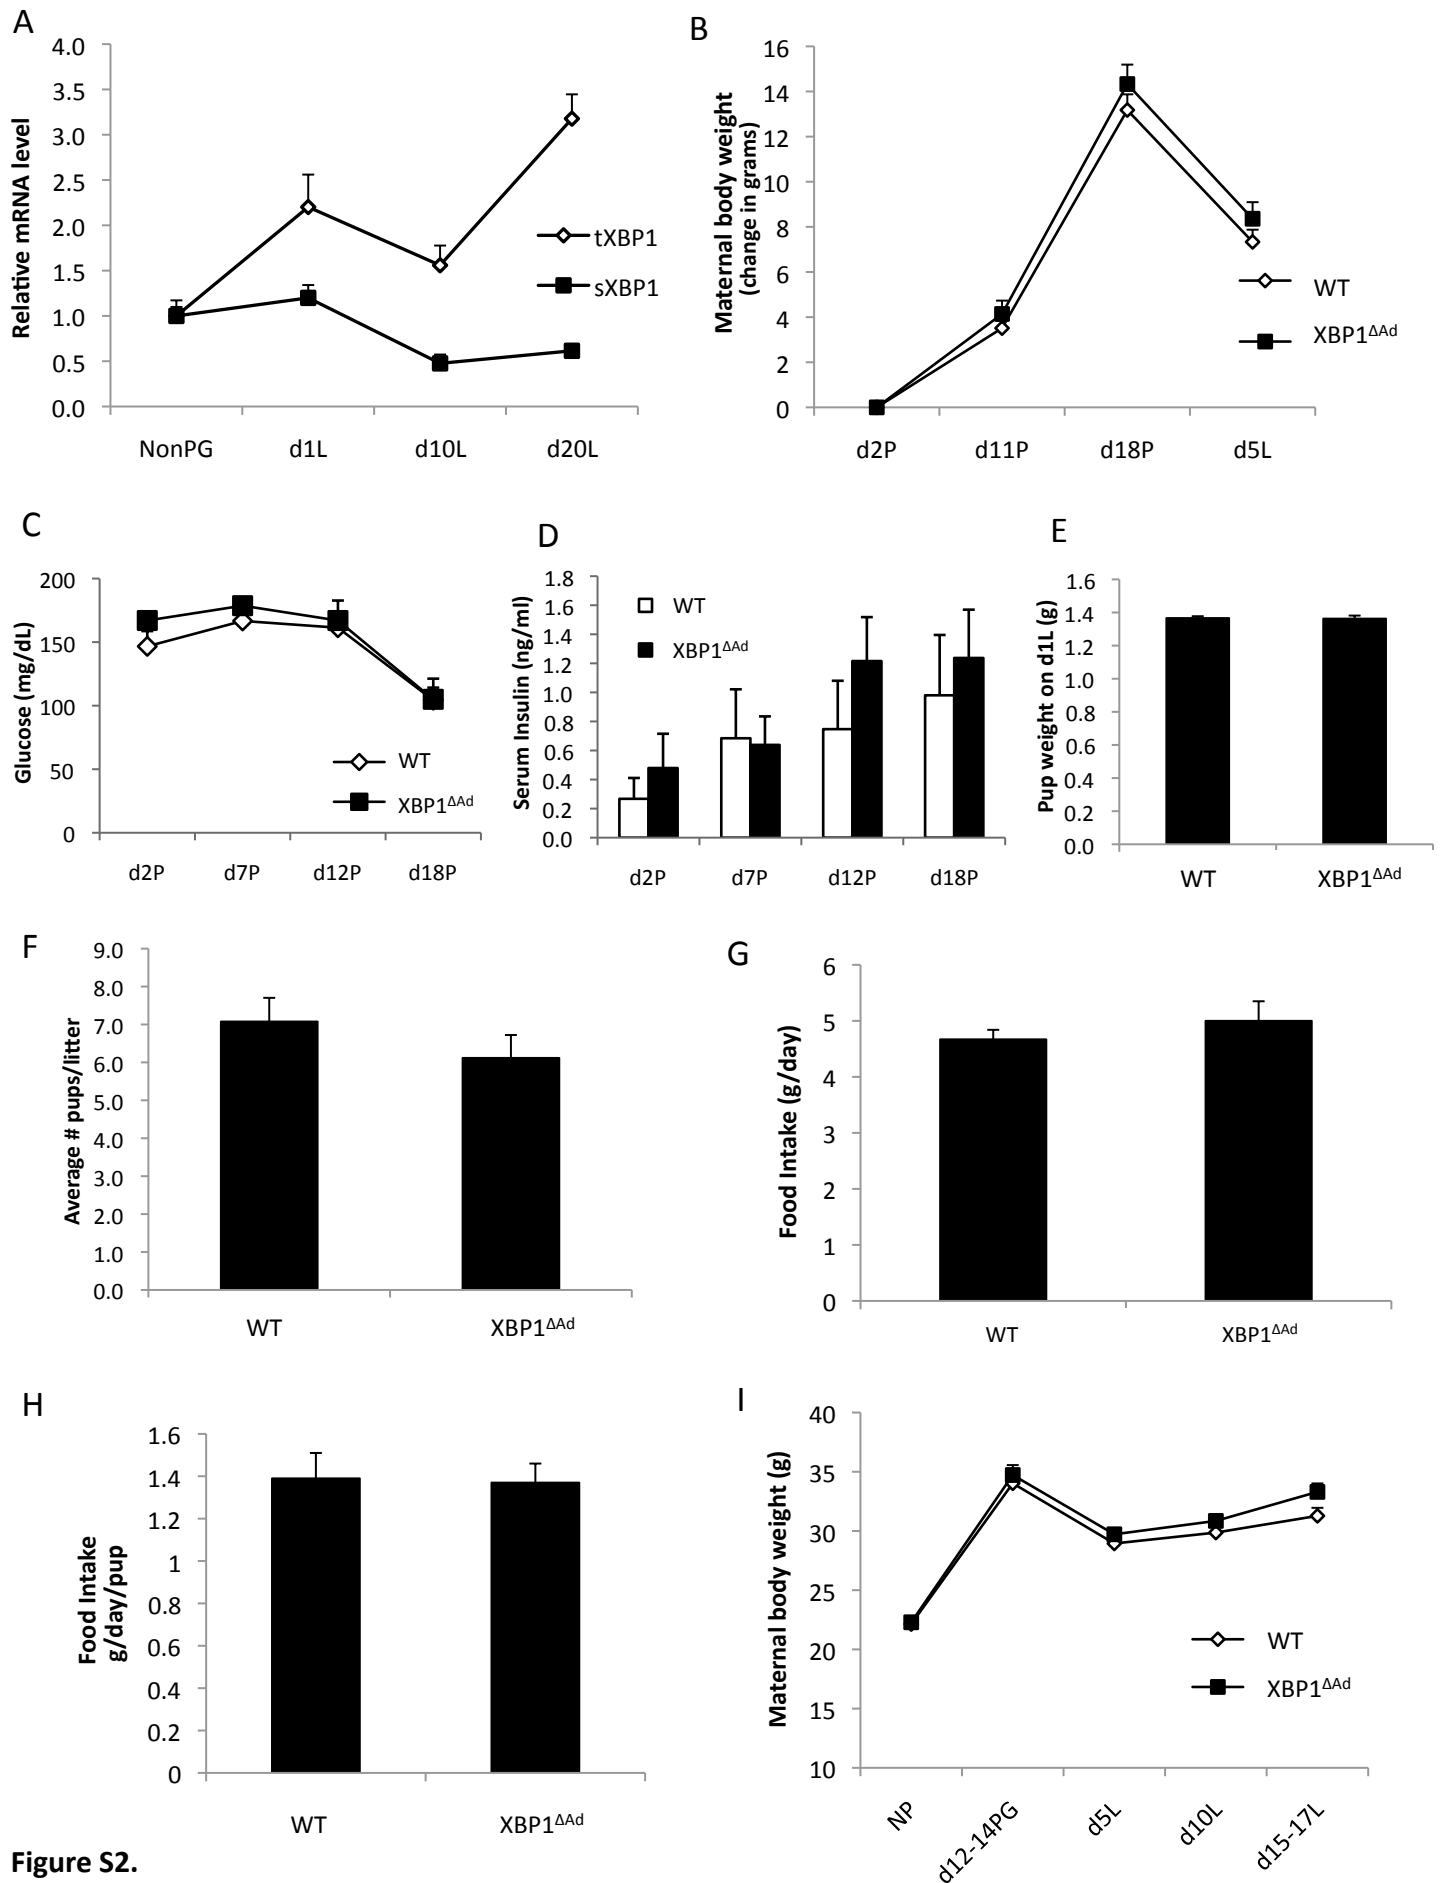

Figure S2.

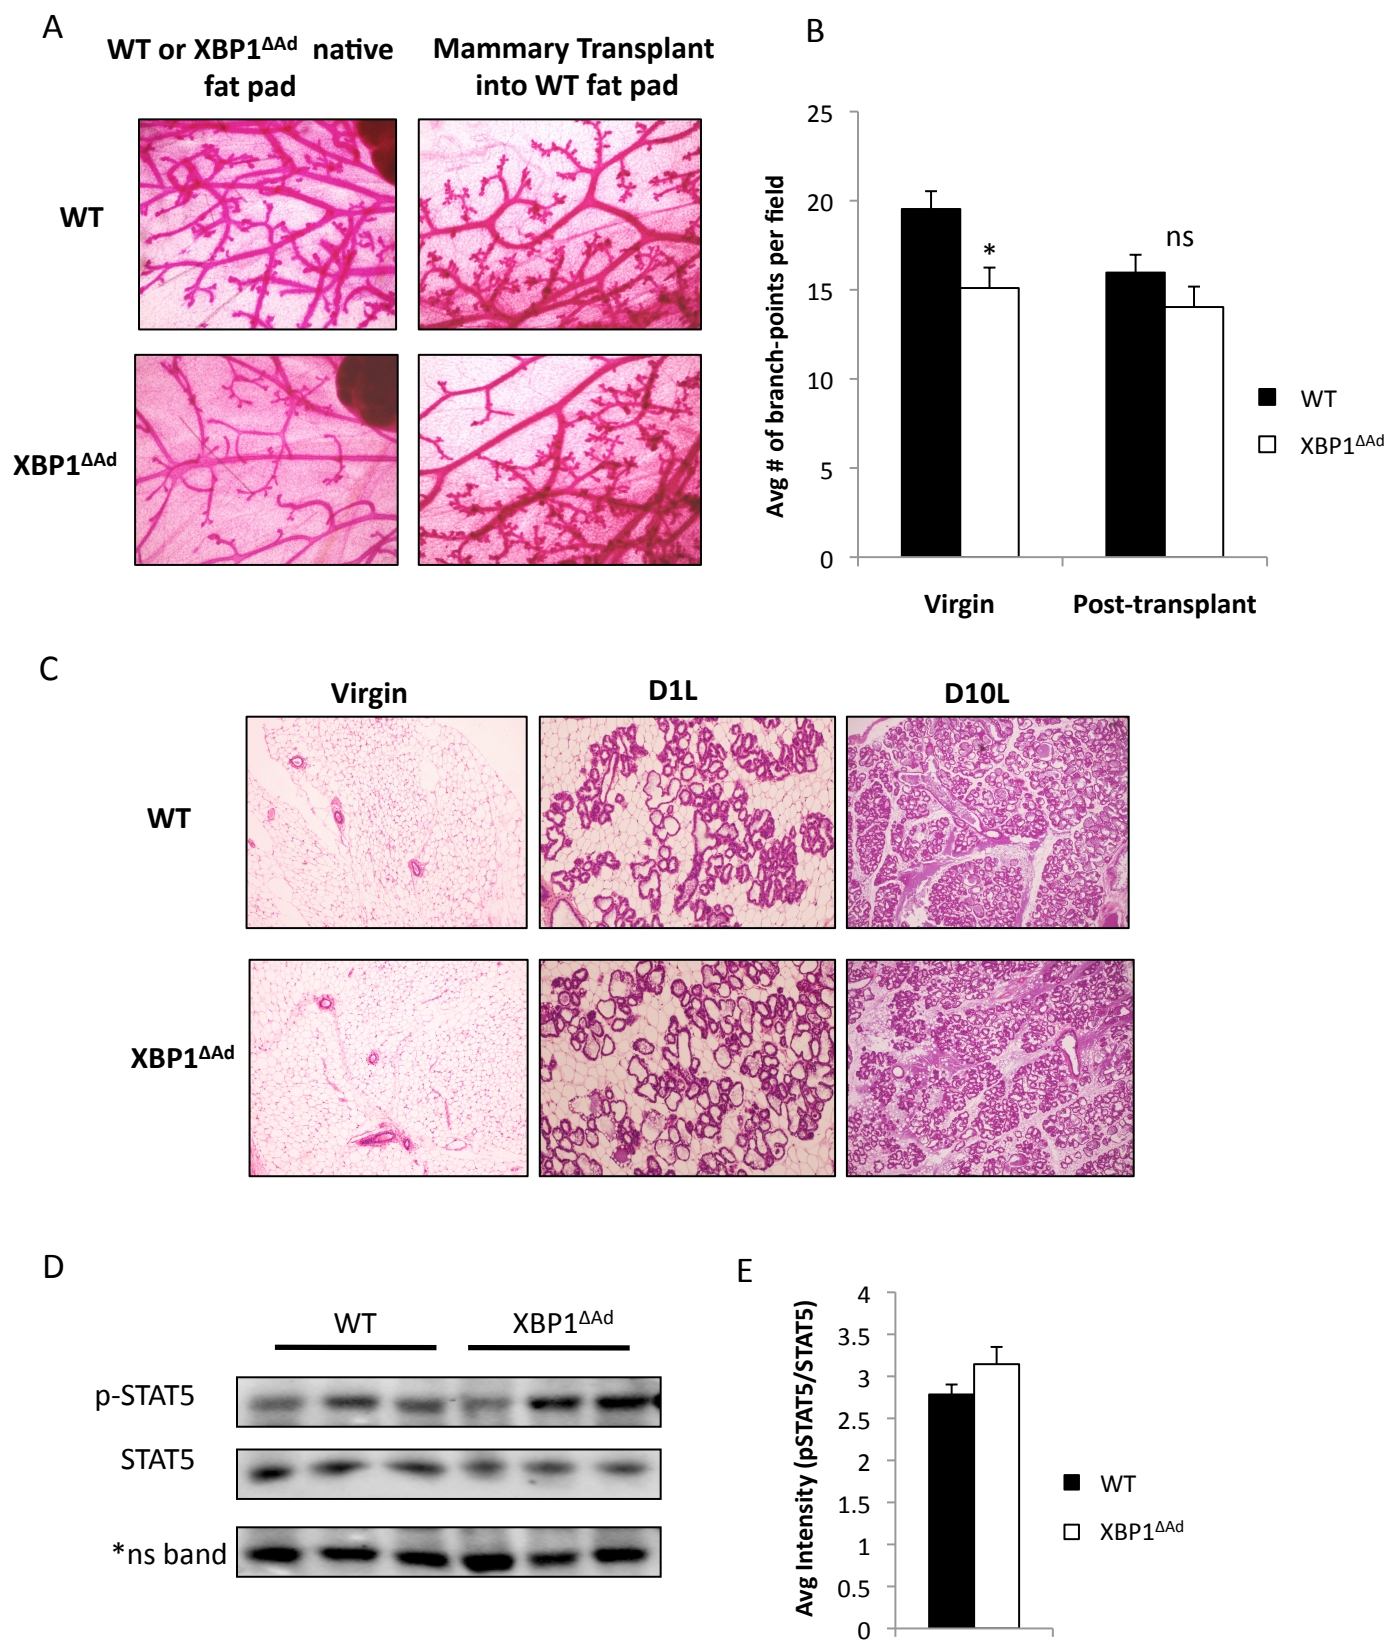

Figure S3.

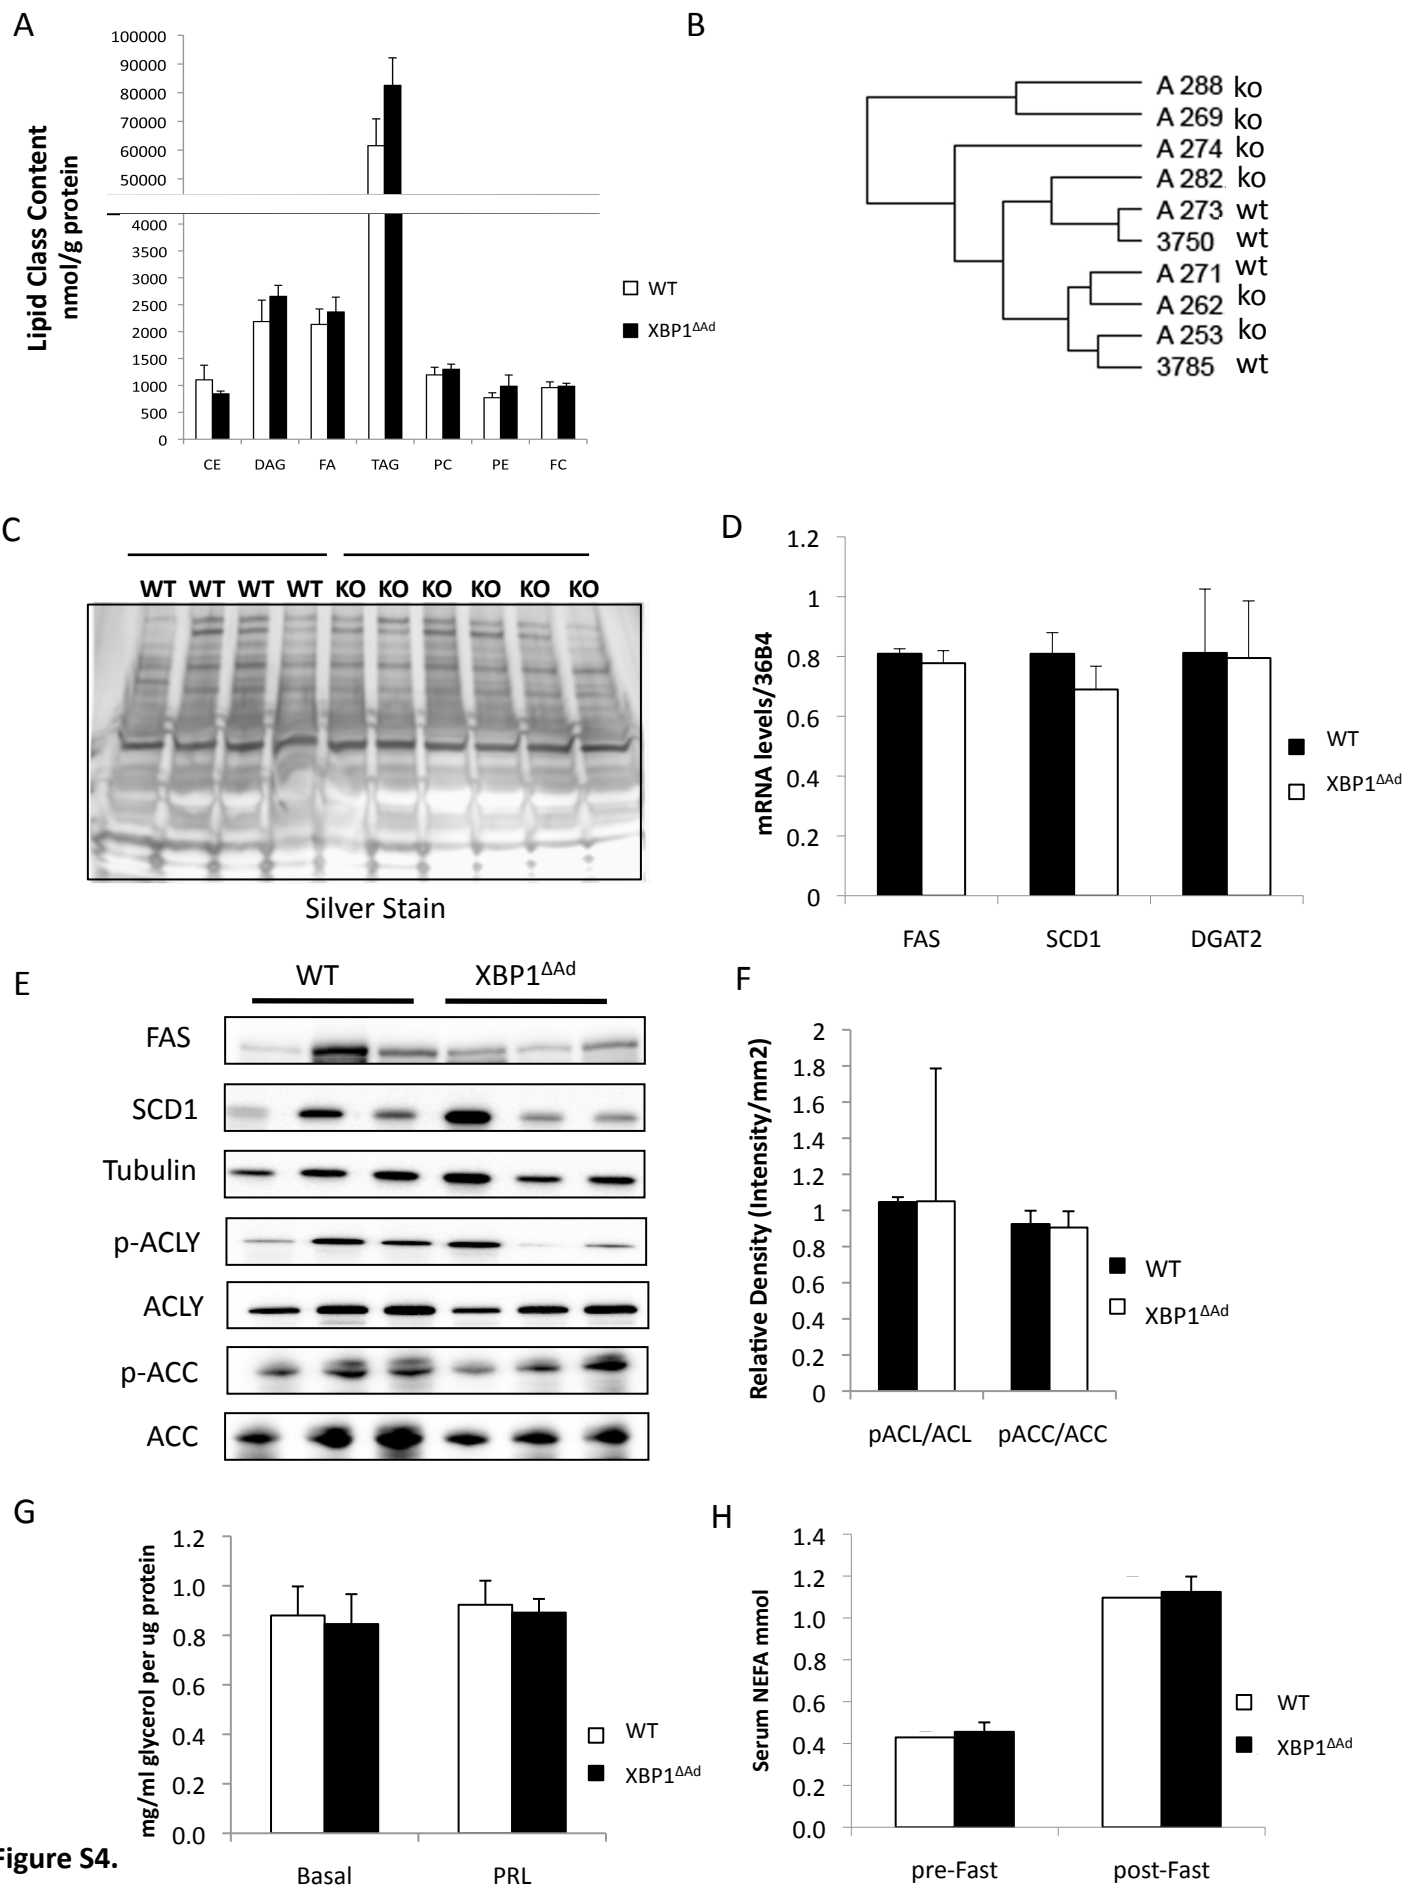

Figure S4.
